# Supplementary material for: Advanced backcross QTL analysis reveals complicated genetic control of rice grain shape in a japonica × indica cross
Source: PubMed Central journal article supplement — Breed Sci. 2015 Sep 1;65(4):308–18. doi: 10.1270/jsbbs.65.308 (PMC4542931; doi:10.1270/jsbbs.65.308), 2015-09-01
Supplement: 65_308_1.pdf [file 65_308_1.pdf]

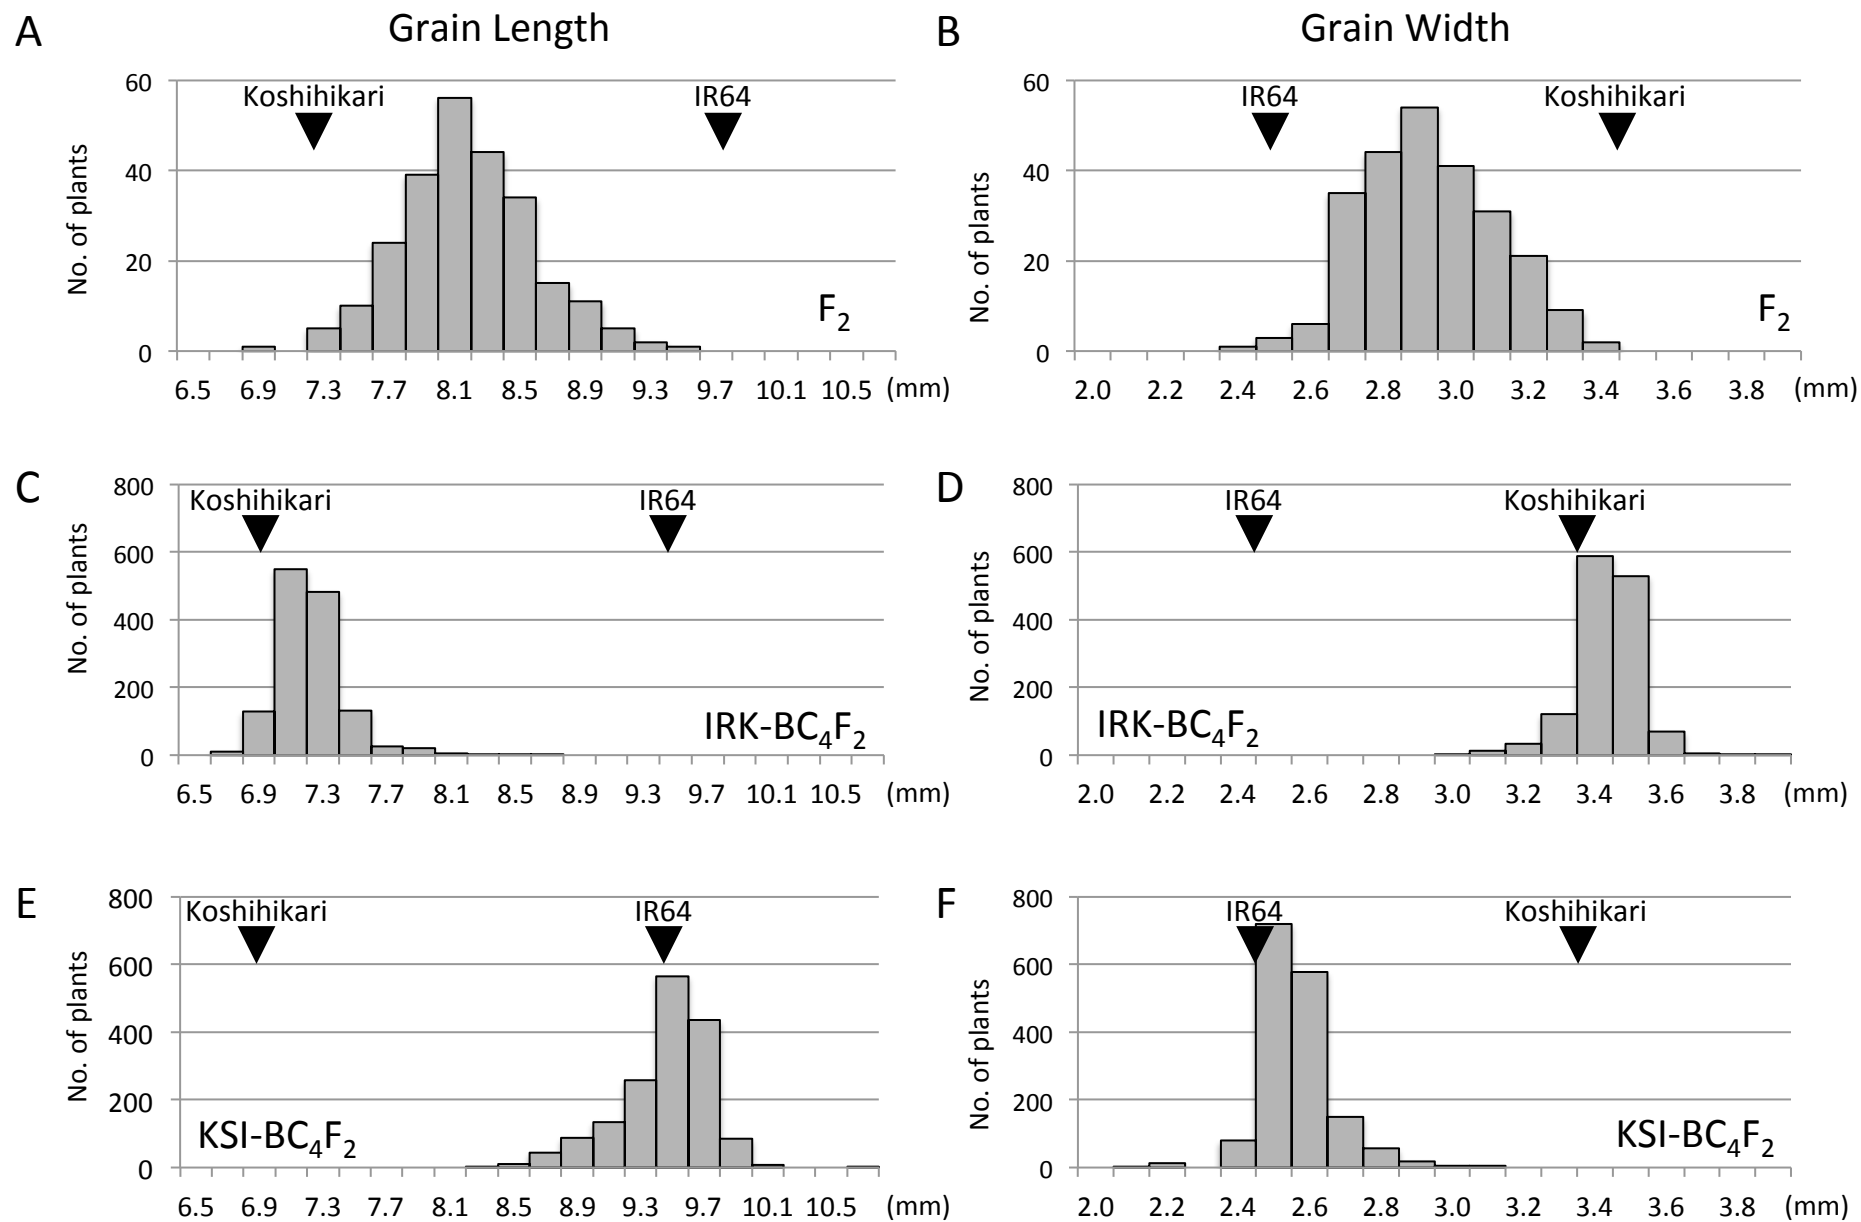

**Supplemental Fig. 1.** Frequency distributions of grain length and grain width in the  $F_2$  population and in selected populations from IRK- $BC_4F_2$  (IR64 introgression in Koshihikari background) and KSI- $BC_4F_2$  (Koshihikari introgression in IR64 background). A, B: Grain length and grain width, respectively, in the  $F_2$  population. C, E: Grain length in IRK- $BC_4F_2$  and KSI- $BC_4F_2$ , respectively. D, F: Grain width in IRK- $BC_4F_2$  and KSI- $BC_4F_2$ , respectively. Triangles represent the positions of the means of the two parent cultivars.
