# Supplementary material for: Advanced backcross QTL analysis reveals complicated genetic control of rice grain shape in a japonica × indica cross
Source: PubMed Central journal article supplement — Breed Sci. 2015 Sep 1;65(4):308–18. doi: 10.1270/jsbbs.65.308 (PMC4542931; doi:10.1270/jsbbs.65.308), 2015-09-01
Supplement: 65_308_2.pdf [file 65_308_2.pdf]

**Supplemental Table 1.** DNA markers used and their position on the IRGSP1.0 reference genome

| Marker name | Chr. | Position (Mb) | Marker name | Chr.                     | Position (Mb) | Marker name | Chr. | Position (Mb)          | Marker name | Chr.  | Position (Mb) |                         |    |       |     |
|-------------|------|---------------|-------------|--------------------------|---------------|-------------|------|------------------------|-------------|-------|---------------|-------------------------|----|-------|-----|
| RM3252      | 1    | 0.30          | a           | RM6783                   | 3             | 9.32        | b,c  | RM3805                 | 6           | 2.85  | a             | RM23766                 | 9  | 3.64  | a   |
| RM3148-1    | 1    | 0.75          | b,c         | RM1371                   | 3             | 9.94        | a    | RM7420                 | 6           | 3.95  | b             | RM23823                 | 9  | 5.13  | a   |
| RM6324      | 1    | 2.38          | a           | RM5955-1                 | 3             | 11.18       | c    | RM4608                 | 6           | 4.30  | a             | RM7481                  | 9  | 6.59  | a   |
| RM5336      | 1    | 3.37          | b,c         | RM5551                   | 3             | 12.93       | a    | RM2615                 | 6           | 5.96  | b             | RM5515                  | 9  | 7.15  | b,c |
| RM8105      | 1    | 4.05          | a           | RM3291                   | 3             | 13.60       | b    | RM5855                 | 6           | 7.41  | b             | RM1328                  | 9  | 9.21  | a   |
| RM5641      | 1    | 4.97          | b           | RM6080                   | 3             | 13.93       | b,c  | RM5585-1               | 6           | 7.61  | b             | RM7387                  | 9  | 10.14 | b,c |
| RM8111      | 1    | 6.27          | a           | RM1164                   | 3             | 14.86       | b,c  | Hd1-ID006 <sup>d</sup> | 6           | 9.34  | b             | RM6051                  | 9  | 12.83 | a   |
| RM5800      | 1    | 7.40          | b,c         | GS3_ID001_3 <sup>e</sup> | 3             | 16.73       | a    | RM19830                | 6           | 10.57 | b             | RM3700                  | 9  | 15.43 | a   |
| RM6466      | 1    | 9.19          | a           | RM1334                   | 3             | 17.42       | a    | RM3330                 | 6           | 11.07 | b             | RM1189                  | 9  | 16.27 | b   |
| RM3627      | 1    | 10.31         | b,c         | RM7431                   | 3             | 19.52       | c    | RM19951                | 6           | 12.98 | a             | RM6235                  | 9  | 16.68 | a   |
| RM10787     | 1    | 12.49         | a           | RM7370                   | 3             | 21.15       | b,c  | RM20048                | 6           | 16.10 | b             | RM5102                  | 9  | 18.04 | b,c |
| RM5365      | 1    | 14.52         | a           | RM7134                   | 3             | 22.01       | a    | RM6818                 | 6           | 16.58 | a             | RM5786-1                | 9  | 19.79 | a   |
| RM5385      | 1    | 17.31         | c           | RM8208                   | 3             | 22.40       | b,c  | RM20158                | 6           | 19.70 | a             | RM3636                  | 9  | 20.84 | b,c |
| RM11024     | 1    | 18.48         | a           | RM6266                   | 3             | 23.82       | a    | RM7193                 | 6           | 20.26 | c             | RM6971                  | 9  | 21.89 | a   |
| RM5638      | 1    | 20.94         | c           | RM3513                   | 3             | 25.11       | b,c  | RM3827-1               | 6           | 22.30 | c             | RM6816                  | 9  | 22.21 | c   |
| RM1196      | 1    | 21.90         | a           | RM6736                   | 3             | 27.32       | b,c  | RM1340-1               | 6           | 23.34 | a             | RM6797                  | 9  | 22.71 | b,c |
| RM6880      | 1    | 22.00         | c           | RM6358-1                 | 3             | 28.78       | b,c  | RM6395                 | 6           | 26.00 | b,c           | RM7492                  | 10 | 0.05  | a   |
| RM6716      | 1    | 23.12         | b,c         | RM3525                   | 3             | 30.39       | b,c  | RM5509                 | 6           | 27.83 | a             | RM7545                  | 10 | 3.81  | b,c |
| RM7124      | 1    | 24.39         | c           | RM5813                   | 3             | 30.98       | a    | RM3138                 | 6           | 28.47 | b             | RM25151                 | 10 | 7.62  | a   |
| RM8129      | 1    | 25.07         | a           | RM1238                   | 3             | 32.08       | c    | RM3307                 | 6           | 28.95 | a             | RM4455                  | 10 | 11.74 | a   |
| RM3440      | 1    | 27.19         | b,c         | RM1352-1                 | 3             | 32.35       | a    | RM3343                 | 6           | 29.62 | b,c           | RM5689                  | 10 | 13.55 | b   |
| RM3817      | 1    | 28.90         | a           | RM7000                   | 3             | 33.80       | b    | RM5463-1               | 6           | 30.99 | a             | RM1859                  | 10 | 13.56 | b,c |
| RM6702      | 1    | 29.77         | c           | RM3329                   | 3             | 35.60       | a    | RM4584                 | 7           | 0.50  | b,c           | RM5620                  | 10 | 17.47 | a   |
| RM1183      | 1    | 30.98         | b,c         | RM3335                   | 4             | 0.69        | b,c  | RM1085                 | 7           | 1.24  | b             | RM1937                  | 10 | 18.00 | b   |
| RM6648      | 1    | 32.34         | a           | RM6770                   | 4             | 2.83        | c    | RM5752-1               | 7           | 2.57  | a             | RM6737                  | 10 | 18.78 | a   |
| RM1003      | 1    | 33.48         | b,c         | RM7200                   | 4             | 4.04        | a    | RM1353-1               | 7           | 3.31  | b             | RM1146                  | 10 | 19.69 | b,c |
| RM7594      | 1    | 35.47         | a           | RM3658                   | 4             | 5.61        | c    | RM7479-1               | 7           | 4.14  | a             | RM1162                  | 10 | 22.43 | b,c |
| RM6333      | 1    | 38.01         | b,c         | RM6659                   | 4             | 6.58        | a    | RM6728                 | 7           | 5.73  | b             | RM7093                  | 10 | 22.83 | b,c |
| RM1387      | 1    | 40.21         | a           | RM7472                   | 4             | 7.10        | c    | RM8006                 | 7           | 7.69  | a             | RM6673                  | 10 | 23.08 | a   |
| RM5310      | 1    | 41.20         | b,c         | RM16616                  | 4             | 12.05       | a    | RM5436                 | 7           | 9.08  | b             | RM7203                  | 11 | 1.08  | a   |
| RM8137      | 1    | 42.93         | a           | RM5633                   | 4             | 13.08       | a    | RM5499                 | 7           | 9.99  | a             | RM3668                  | 11 | 1.46  | b,c |
| RM6938      | 2    | 0.98          | a           | RM16760                  | 4             | 17.10       | a    | RM3635                 | 7           | 11.09 | b             | RM1812                  | 11 | 2.41  | a   |
| RM1285      | 2    | 3.84          | b,c         | RM1205                   | 4             | 19.64       | c    | RM3832                 | 7           | 12.71 | a             | RM6544                  | 11 | 3.86  | c   |
| RM5553      | 2    | 4.67          | a           | RM1359-1                 | 4             | 20.03       | a    | RM3670                 | 7           | 13.44 | b             | RM5704-1                | 11 | 5.48  | a   |
| RM4702      | 2    | 6.22          | c           | RM3042                   | 4             | 23.02       | b,c  | RM5481-1               | 7           | 16.20 | a             | RM7283                  | 11 | 9.12  | a   |
| RM3828      | 2    | 7.65          | a           | RM17148                  | 4             | 24.24       | a    | RM3795                 | 7           | 17.19 | b,c           | RM26567                 | 11 | 13.39 | a   |
| RM3390      | 2    | 7.66          | b,c         | RM1388-1                 | 4             | 25.22       | b,c  | RM6835                 | 7           | 17.69 | a             | RM5824                  | 11 | 14.53 | b,c |
| RM5699      | 2    | 8.98          | a           | RM1354                   | 4             | 26.30       | a    | RM3186                 | 7           | 18.63 | c             | RM26616                 | 11 | 14.68 | a   |
| RM1358      | 2    | 10.19         | b,c         | RM3092                   | 4             | 27.72       | c    | RM8257                 | 7           | 18.66 | c             | RM5312                  | 11 | 17.63 | a   |
| RM5210      | 2    | 12.67         | a           | RM3916                   | 4             | 28.76       | a    | RM3404-1               | 7           | 20.11 | a             | RM5349                  | 11 | 19.65 | a   |
| RM3443      | 2    | 14.33         | b,c         | RM7208                   | 4             | 30.14       | c    | RM3799                 | 7           | 21.63 | b,c           | RM1219                  | 11 | 21.52 | a   |
| RM5812      | 2    | 15.90         | a           | RM3534                   | 4             | 31.16       | a    | RM6326                 | 7           | 24.20 | a             | RM6105                  | 11 | 24.11 | b,c |
| RM7426      | 2    | 16.68         | a           | RM3466                   | 4             | 34.05       | a    | RM6344                 | 7           | 24.96 | b,c           | RM2191-1                | 11 | 25.13 | a   |
| RM1211-1    | 2    | 18.46         | c           | RM5608                   | 4             | 35.36       | a    | RM1330-1               | 7           | 25.66 | a             | RM1233-1                | 11 | 27.01 | b,c |
| RM2634      | 2    | 20.50         | b,c         | RM7030                   | 4             | 35.38       | b,c  | RM7601                 | 7           | 29.04 | a             | RM2064                  | 11 | 27.49 | a   |
| RM3666      | 2    | 20.90         | c           | RM1248                   | 5             | 0.09        | a    | RM1381-1               | 8           | 0.42  | a             | BX000503_3 <sup>d</sup> | 12 | 0.08  | b,c |
| RM5427      | 2    | 21.52         | c           | RM1024                   | 5             | 1.23        | b    | RM6356                 | 8           | 1.56  | b             | RM1208                  | 12 | 1.08  | c   |
| RM6379      | 2    | 23.57         | a           | RM6517                   | 5             | 2.91        | a    | RM1148                 | 8           | 3.74  | a             | RM3747                  | 12 | 2.31  | a   |
| RM1307      | 2    | 25.83         | b,c         | RM3322                   | 5             | 4.26        | b    | RM6838                 | 8           | 5.85  | a             | RM6998                  | 12 | 4.75  | b,c |
| RM1367-1    | 2    | 27.07         | a           | RM18107                  | 5             | 6.83        | a    | RM3507                 | 8           | 6.16  | b             | RM27724                 | 12 | 5.51  | a   |
| RM3685      | 2    | 29.29         | b,c         | RM4691                   | 5             | 7.03        | a    | RM22679                | 8           | 8.58  | a             | RM6905                  | 12 | 6.75  | b,c |
| RM13958     | 2    | 31.20         | a           | RM18194                  | 5             | 9.35        | a    | RM3481                 | 8           | 9.14  | b             | RM27792                 | 12 | 7.10  | c   |
| RM5404      | 2    | 33.68         | b,c         | RM5140                   | 5             | 13.54       | a    | RM3395                 | 8           | 10.29 | a             | RM2529                  | 12 | 7.57  | a   |
| RM3789-1    | 2    | 34.69         | b,c         | RM1237                   | 5             | 18.02       | a    | RM6032                 | 8           | 11.90 | b,c           | RM27900                 | 12 | 9.57  | a   |
| RM1255      | 2    | 35.26         | b,c         | RM6621                   | 5             | 18.84       | b    | RM22839                | 8           | 12.41 | a             | RM6973-1                | 12 | 10.08 | b,c |
| RM3850      | 2    | 35.43         | a           | RM1386                   | 5             | 20.06       | a    | RM22934                | 8           | 15.97 | a             | RM7102-1                | 12 | 13.21 | a   |
| RM4108      | 3    | 0.54          | a           | RM3351-1                 | 5             | 20.76       | b    | RM6382                 | 8           | 16.92 | c             | RM28112                 | 12 | 16.28 | a   |
| RM3894      | 3    | 1.12          | c           | RM4501                   | 5             | 22.11       | a    | RM5767                 | 8           | 18.82 | a             | RM7344                  | 12 | 17.95 | b   |
| RM1332      | 3    | 2.45          | b,c         | RM3476                   | 5             | 23.91       | a    | RM7049-1               | 8           | 20.82 | b,c           | RM28305                 | 12 | 19.96 | a   |
| RM6829      | 3    | 2.88          | c           | RM6972                   | 5             | 25.41       | c    | RM7556                 | 8           | 22.21 | a             | RM5700-1                | 12 | 21.98 | b,c |
| RM4352      | 3    | 4.32          | a           | RM3809                   | 5             | 26.65       | a    | RM3845                 | 8           | 24.76 | b,c           | RM3331                  | 12 | 23.49 | b,c |
| RM6038      | 3    | 4.83          | c           | RM3170                   | 5             | 28.02       | b,c  | RM3155-1               | 8           | 27.91 | a             | RM5479-1                | 12 | 24.41 | a   |
| RM5442      | 3    | 5.53          | a           | RM3286                   | 5             | 29.54       | a    | RM3840                 | 8           | 27.93 | c             | RM1159                  | 12 | 25.94 | b,c |
| RM3766-1    | 3    | 6.93          | b,c         | RM8121                   | 6             | 0.38        | a    | RM4997                 | 8           | 28.24 | b,c           | RM1300                  | 12 | 26.00 | c   |
| RM1338-1    | 3    | 8.39          | a           | RM7399                   | 6             | 1.05        | b    | RM3609                 | 9           | 1.16  | a             | RM2197                  | 12 | 27.38 | a   |

a. 130 markers were used in the F<sub>2</sub> population and in the primary survey of the IRK-BC<sub>2</sub>F<sub>2</sub> and KSI-BC<sub>2</sub>F<sub>2</sub> populations (see Fig. 1 for details).

b and c. Additional markers used in the IRK-BC<sub>2</sub>F<sub>2</sub> and KSI-BC<sub>2</sub>F<sub>2</sub> populations, respectively (see Fig. 1 for details).

d. Primer sequences of insertion/deletion markers: Hd1-ID006, 5' -GTGCGTGGCGTGCGACGT-3' (forward), 5' -CTCAGCAGGAGCGAGGTGGCC-3' (reverse); BX000503\_3, 5' -GGGGCAAAGAAGGAATTT-3' (forward), 5' -TTCCTCCTCTCCGATCCTCT-3' (reverse).

e. Primer sequences of the SNP marker GS3\_ID001\_3: 5' -TTTTTTTTTTTTTTTTTTTTCGAGCGTGCTTACTCTGTG-3' (forward, specific to IR64 allele), 5' -GCAGGCTGGCTTACTCCCTT-3' (forward, specific to Koshihikari allele), 5' -ACAACGTATATATTTCTTGCAGGT-3' (reverse).
